# Supplementary material for: Tauroursodeoxycholic acid (TUDCA)-induced increase in ectopic muscle mineralization occurs exclusively in dystrophic muscles and is independent of endoplasmic reticulum stress
Source: Research Square preprint supplement (doi:10.21203/rs.3.rs-6401076/v1), 2025-05-08
Supplement: Supplementary file 1 [file a3206cdab8a2c3b5daeabce5.pdf]

Supplement

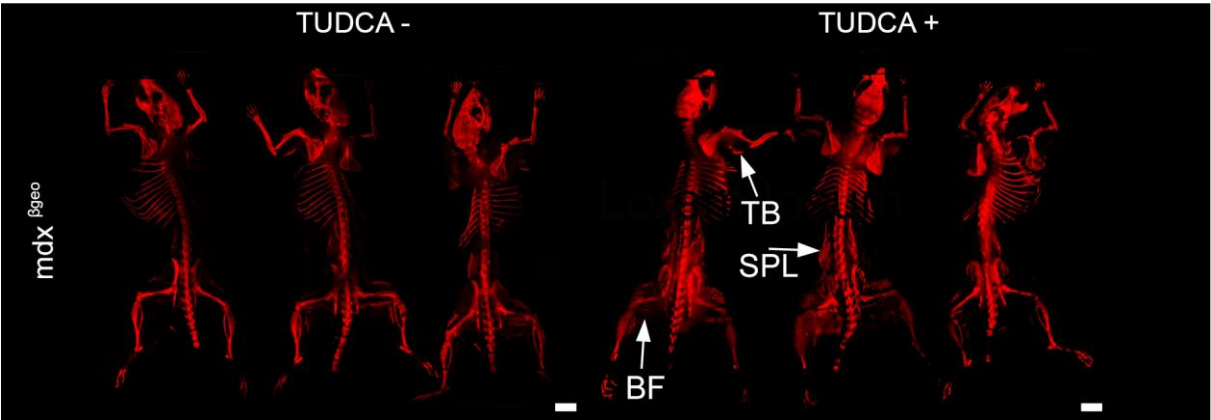

**Suppl. 1. Whole-body visualisation of ectopic calcifications in *Dmd*<sup>mdx<sup>β</sup>geo</sup> mice treated with TUDCA.**

TB – Triceps branchii, SPL - Spinalis pars lumborum, BF – Biceps femoris  
Scale bar = 1 mm.

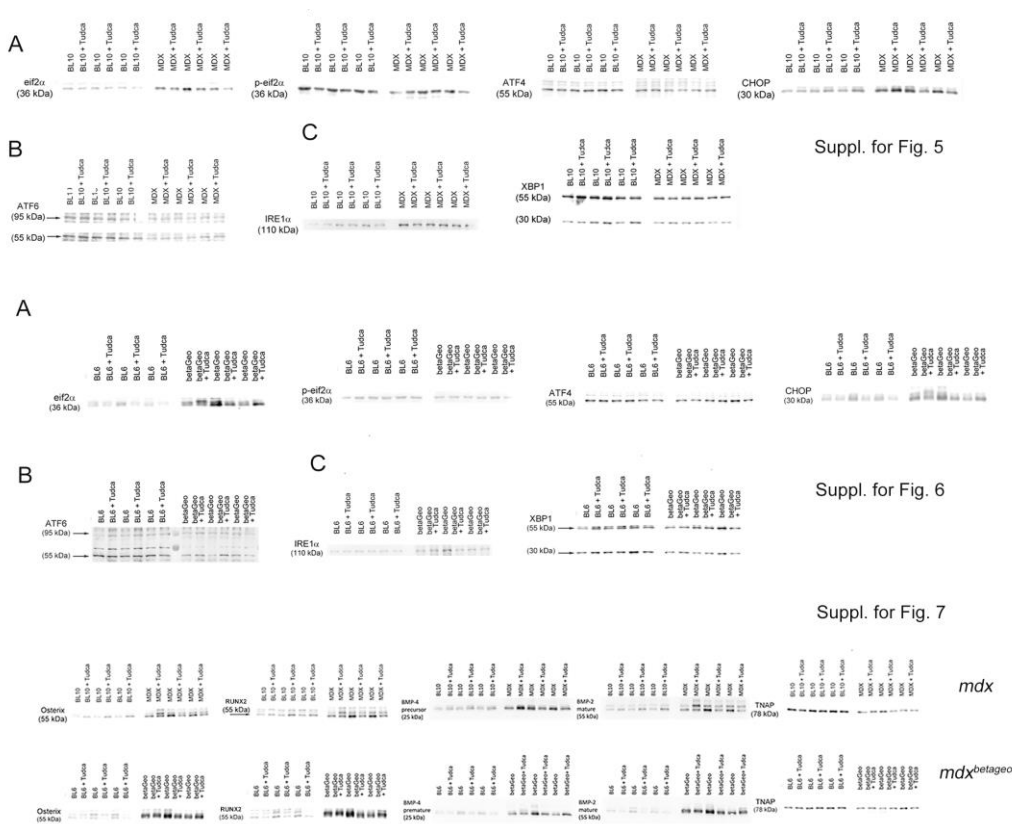

**Suppl. 2. Western blots for Figures 5, 6 and 7.**

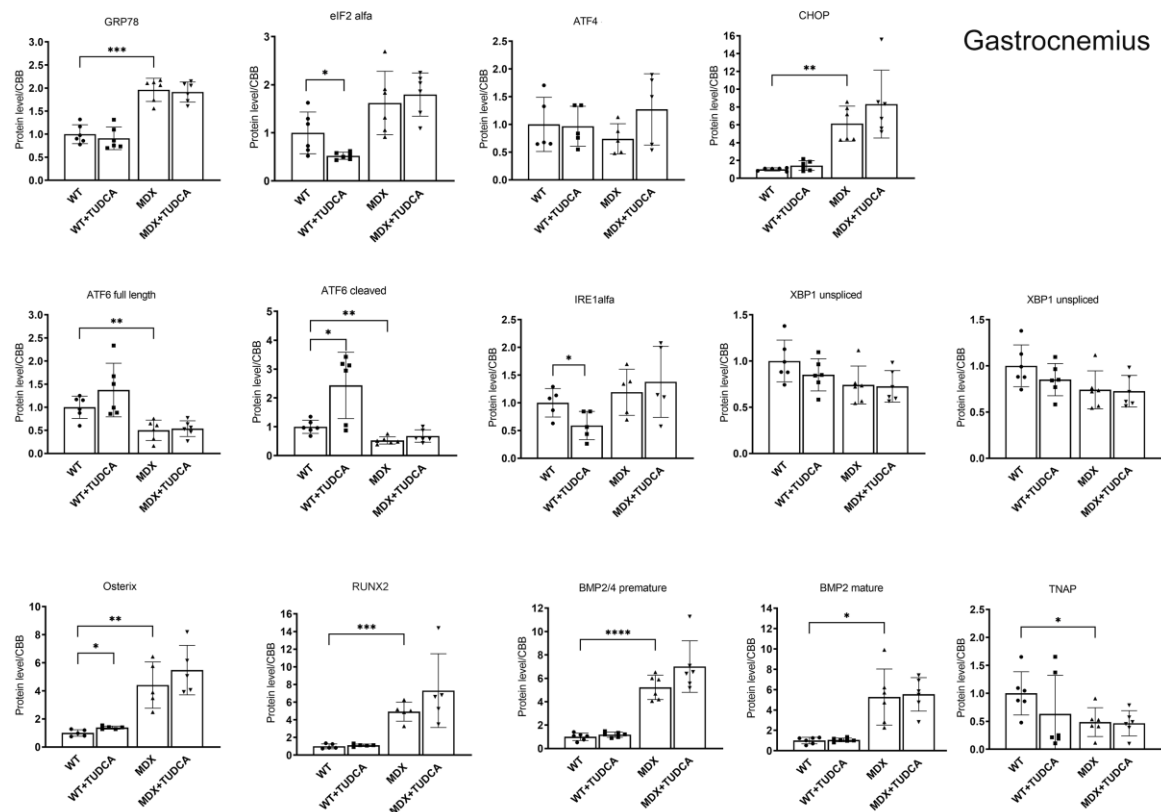

**Suppl. 3. Effect of TUDCA on unfolded protein response and osteogenic marker levels in lysates from *Dmd<sup>mdx</sup>* and wild-type mouse gastrocnemius.**

Graphs present relative protein levels in lysates from gastrocnemius muscle

Similarly as it was shown for the triceps muscle ER-stress marker levels in mdx gastrocnemius are substantially affected in comparison to dystrophin-positive (w/t) muscle. Although the pattern of these changes is different in both type of muscles, TUDCA does not influence *dystrophic* muscle at least in this matter. Therefore the enhanced calcification of them in TUDCA treated mice cannot be explained as an effect of this compound on the ER stress. Moreover, TUDCA was expected to reduce ER-stress and therefore prevent muscle calcification instead of its magnification.
